# Supplementary material for: Successful improvement of antibiotic prescribing at Primary Care in Andalusia following the implementation of an antimicrobial guide through multifaceted interventions: An interrupted time-series analysis
Source: PLOS journal article supplement (doi:10.1371/journal.pone.0233062), 2020-05-15

## Publication of the Aljarafe Guide

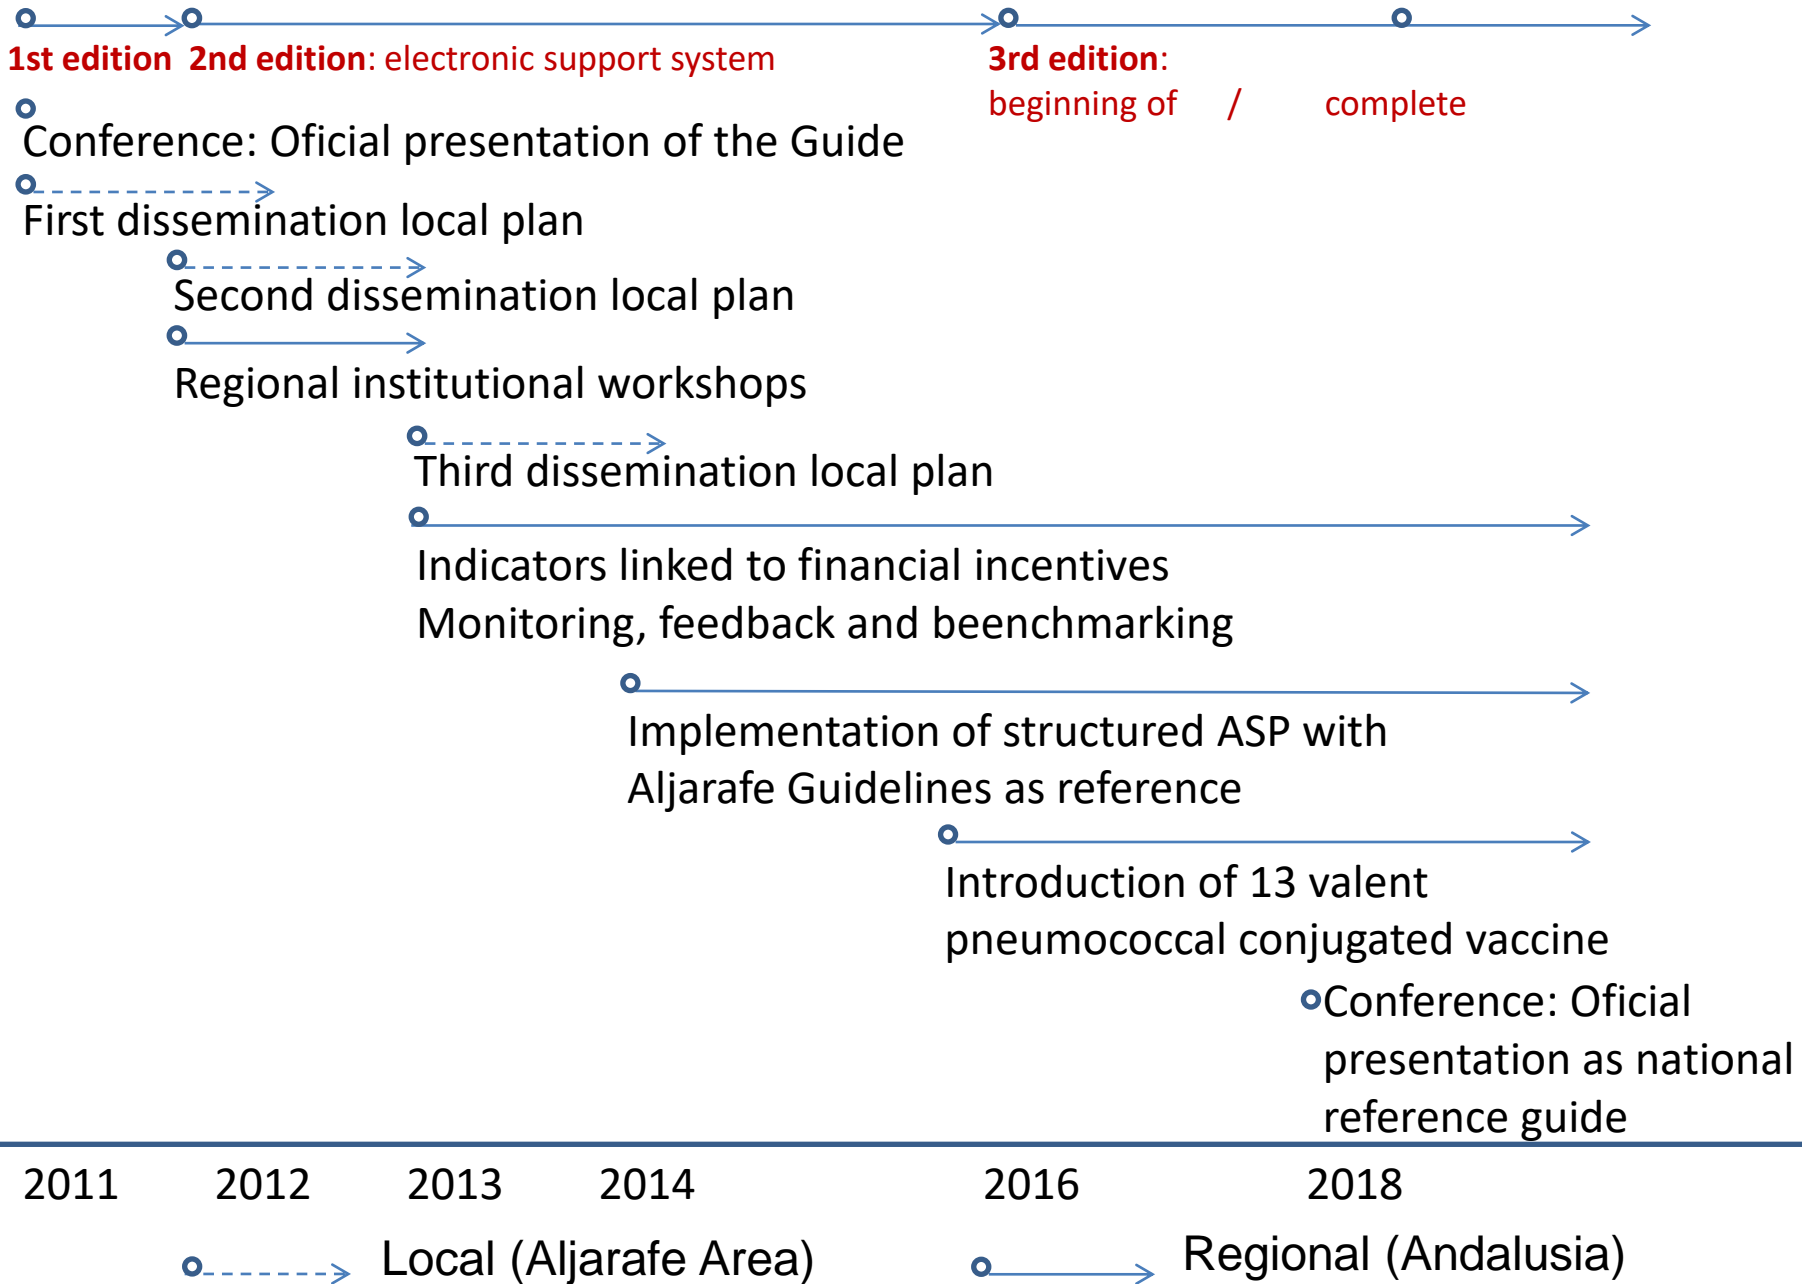

Supplement: S1 (10.1371/journal.pone.0233062.s001) [file journal.pone.0233062.s001]
